# Supplementary material for: Foldscope: Origami-Based Paper Microscope
Source: PubMed Central journal article supplement (PMC4062392; doi:10.1371/journal.pone.0098781), 2014-06-18
Supplement: pone.0098781.s008.pdf [file pone.0098781.s008.pdf]

# FOLDSCOPE ASSEMBLY — QUICK REFERENCE GUIDE

| STEP  | INSTRUCTION                                            | RESULT                                                                               |
|-------|--------------------------------------------------------|--------------------------------------------------------------------------------------|
| 1-2   | REMOVE PARTS<br><br>FOLD <u>"T" PART</u> [1]           |    |
| 3-6   | FOLD <u>"L" PART</u> [2]<br><br>MOUNT LENS             |    |
| 7-9   | ASSEMBLE [1] + [2]<br><br>INSERT LENS                  |   |
| 10-11 | INSERT <u>"TURTLE" PART</u> [3]<br><br>ALIGN [2] + [3] |  |
| 12-13 | INSERT "TURTLE" LEGS<br><br>INSERT SLIDE AND VIEW!     |  |
